# Supplementary material
Source: publisher figshare collection journal article supplement (https://sage.figshare.com/ndownloader/files/15367760)
Supplement: Supplementary file 1 [file 15367760]

## Appendix

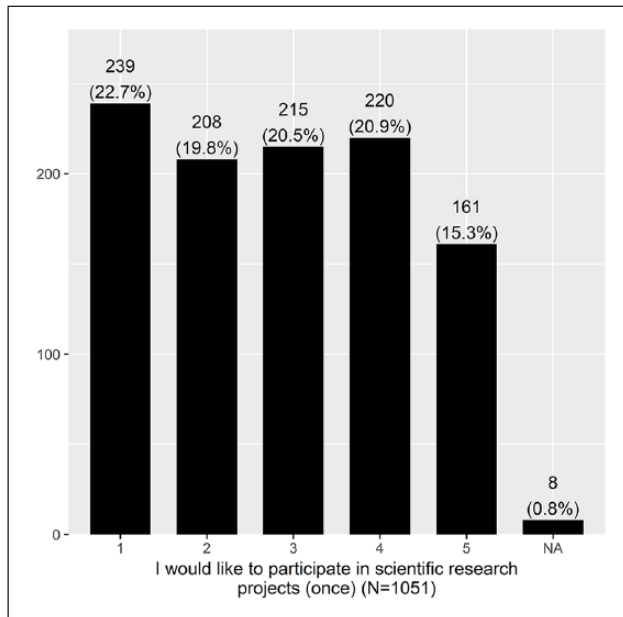

Distribution of people's interest in participating in scientific research

Regression model for respondents older than 25 years.

| DV: „I would like to participate in scientific research projects (once)“ |               |              |                |
|--------------------------------------------------------------------------|---------------|--------------|----------------|
| Explanatory Variables                                                    | Std. Betas    | CI           | p              |
| (Intercept)                                                              | -0.05         | -0.11 – 0.01 | 0.121          |
| Age                                                                      | -0.06         | -0.15 – 0.03 | 0.219          |
| Female                                                                   | 0.02          | -0.05 – 0.09 | 0.652          |
| Tertiary Education                                                       | 0.04          | -0.02 – 0.11 | 0.191          |
| Household with Children                                                  | 0.10          | 0.04 – 0.16  | <b>0.001</b>   |
| Full-time Work                                                           | 0.03          | -0.04 – 0.10 | 0.351          |
| Political Orientation (left:1-7:right)                                   | 0.01          | -0.05 – 0.07 | 0.778          |
| Religiosity (1-5)                                                        | -0.02         | -0.08 – 0.04 | 0.505          |
| Proximity to Science (0-4)                                               | 0.06          | -0.01 – 0.13 | 0.077          |
| Scientific Literacy (0-2)                                                | 0.01          | -0.05 – 0.08 | 0.730          |
| Trust in Science (1-5)                                                   | 0.03          | -0.04 – 0.09 | 0.416          |
| Interest in Science (1-5)                                                | 0.14          | 0.07 – 0.21  | < <b>0.001</b> |
| Personal Life-Relevance of Science (1-5)                                 | 0.35          | 0.28 – 0.42  | < <b>0.001</b> |
| Science Information Seeking (1-5)                                        | 0.11          | 0.03 – 0.18  | <b>0.004</b>   |
| Observations                                                             | 779           |              |                |
| R <sup>2</sup> / adjusted R <sup>2</sup>                                 | 0.339 / 0.328 |              |                |

*LatentGold 5.1 Syntax Specifications*

```
options
  maxthreads=8;
  algorithm
    tolerance=1e-008 emtolerance=0.01 emiterations=250 nriterations=50 ;
  startvalues
    seed=0 sets=5000 tolerance=1e-005 iterations=50;
  bayes
    categorical=1 variances=1 latent=1 poisson=1;
  montecarlo
    seed=0 sets=0 replicates=500 tolerance=1e-008;
  quadrature nodes=10;
  missing includeall;
  output
    parameters=effect betaopts=wl standarderrors=robust profile probmeans=posterior
    bivariateresiduals classification estimatedvalues=model
```

*BIC values*

*BIC values of LCA solutions.*

| BICs              | Number of Segments |
|-------------------|--------------------|
| 13220.7658        | 1                  |
| 13016.2247        | 2                  |
| 12869.4015        | 3                  |
| 12846.3074        | 4                  |
| <b>12827.1006</b> | <b>5</b>           |
| 12838.7216        | 6                  |
| 12874.7154        | 7                  |
| 12913.3271        | 8                  |

## Pairwise t-tests

Comparison 1: Segmentation Variables.

| Age                            | Non-CS | Free-Timers | Senior Sciencephiles | Intrigued Adolescents | Fully Employed Parents |
|--------------------------------|--------|-------------|----------------------|-----------------------|------------------------|
| Free-Timers                    | *      |             |                      |                       |                        |
| Senior Sciencephiles           | *      | 0.50        |                      |                       |                        |
| Intrigued Adolescents          | *      | *           | *                    |                       |                        |
| Fully Employed Parents         | 0.34   | *           | *                    | *                     |                        |
| Young Sciencephiles            | *      | *           | *                    | *                     | *                      |
| <b>Female</b>                  |        |             |                      |                       |                        |
| Free-Timers                    | *      |             |                      |                       |                        |
| Senior Sciencephiles           | *      | *           |                      |                       |                        |
| Intrigued Adolescents          | 0.23   | *           | *                    |                       |                        |
| Fully Employed Parents         | *      | *           | 0.98                 | *                     |                        |
| Young Sciencephiles            | 0.10   | *           | 0.10                 | 0.98                  | 0.08                   |
| <b>Tertiary Education</b>      |        |             |                      |                       |                        |
| Free-Timers                    | 0.69   |             |                      |                       |                        |
| Senior Sciencephiles           | *      | *           |                      |                       |                        |
| Intrigued Adolescents          | *      | *           | *                    |                       |                        |
| Fully Employed Parents         | 0.40   | 0.69        | *                    | *                     |                        |
| Young Sciencephiles            | *      | 0.08        | *                    | *                     | 0.69                   |
| <b>Household with Children</b> |        |             |                      |                       |                        |
| Free-Timers                    | 1.00   |             |                      |                       |                        |
| Senior Sciencephiles           | *      | *           |                      |                       |                        |
| Intrigued Adolescents          | *      | *           | 0.44                 |                       |                        |
| Fully Employed Parents         | *      | *           | 1.00                 | 1.00                  |                        |
| Young Sciencephiles            | 0.45   | 0.29        | 1.00                 | 0.49                  | 1.00                   |
| <b>Fulltimework</b>            |        |             |                      |                       |                        |
| Free-Timers                    | *      |             |                      |                       |                        |
| Senior Sciencephiles           | *      | *           |                      |                       |                        |
| Intrigued Adolescents          | 0.13   | *           | *                    |                       |                        |
| Fully Employed Parents         | *      | *           | *                    | *                     |                        |
| Young Sciencephiles            | 0.24   | *           | *                    | 0.10                  | *                      |
| <b>PolRight</b>                |        |             |                      |                       |                        |
| Free-Timers                    | 1.00   |             |                      |                       |                        |
| Senior Sciencephiles           | 1.00   | 1.00        |                      |                       |                        |
| Intrigued Adolescents          | 1.00   | 0.53        | 1.00                 |                       |                        |
| Fully Employed Parents         | 1.00   | 1.00        | 1.00                 | 0.90                  |                        |
| Young Sciencephiles            | 0.90   | 0.29        | 1.00                 | 1.00                  | 0.53                   |

Comparison 2: Segmentation Variables (continued)

| <b>Religious</b>       | <i>Non-CS</i> | <i>Free-Timers</i> | <i>Senior<br/>Sciencephiles</i> | <i>Intrigued<br/>Adolescents</i> | <i>Fully Employed<br/>Parents</i> |
|------------------------|---------------|--------------------|---------------------------------|----------------------------------|-----------------------------------|
| Free-Timers            | 0.52          |                    |                                 |                                  |                                   |
| Senior Sciencephiles   | *             | *                  |                                 |                                  |                                   |
| Intrigued Adolescents  | 0.13          | *                  | 1.00                            |                                  |                                   |
| Fully Employed Parents | 0.26          | 0.09               | 1.00                            | 1.00                             |                                   |
| Young Sciencephiles    | *             | *                  | 0.26                            | 0.17                             | 0.16                              |
| <b>SciProximity</b>    |               |                    |                                 |                                  |                                   |
| Free-Timers            | 1.00          |                    |                                 |                                  |                                   |
| Senior Sciencephiles   | *             | *                  |                                 |                                  |                                   |
| Intrigued Adolescents  | 1.00          | 1.00               | *                               |                                  |                                   |
| Fully Employed Parents | 0.98          | 1.00               | *                               | 1.00                             |                                   |
| Young Sciencephiles    | *             | *                  | 0.98                            | *                                | *                                 |
| <b>SciLit</b>          |               |                    |                                 |                                  |                                   |
| Free-Timers            | 1.00          |                    |                                 |                                  |                                   |
| Senior Sciencephiles   | *             | *                  |                                 |                                  |                                   |
| Intrigued Adolescents  | 1.00          | 1.00               | *                               |                                  |                                   |
| Fully Employed Parents | 1.00          | 1.00               | *                               | 1.00                             |                                   |
| Young Sciencephiles    | *             | *                  | *                               | *                                | *                                 |
| <b>SciTrust</b>        |               |                    |                                 |                                  |                                   |
| Free-Timers            | *             |                    |                                 |                                  |                                   |
| Senior Sciencephiles   | *             | 0.43               |                                 |                                  |                                   |
| Intrigued Adolescents  | 0.12          | 1.00               | 0.60                            |                                  |                                   |
| Fully Employed Parents | 1.00          | 0.60               | *                               | 0.60                             |                                   |
| Young Sciencephiles    | *             | *                  | 0.43                            | *                                | *                                 |
| <b>SciInterest</b>     |               |                    |                                 |                                  |                                   |
| Free-Timers            | *             |                    |                                 |                                  |                                   |
| Senior Sciencephiles   | *             | *                  |                                 |                                  |                                   |
| Intrigued Adolescents  | *             | 0.57               | *                               |                                  |                                   |
| Fully Employed Parents | 0.23          | 0.31               | *                               | 0.63                             |                                   |
| Young Sciencephiles    | *             | *                  | 0.57                            | *                                | *                                 |
| <b>SciImpForLife</b>   |               |                    |                                 |                                  |                                   |
| Free-Timers            | *             |                    |                                 |                                  |                                   |
| Senior Sciencephiles   | *             | 0.08               |                                 |                                  |                                   |
| Intrigued Adolescents  | *             | 0.35               | *                               |                                  |                                   |
| Fully Employed Parents | *             | 0.19               | *                               | 0.58                             |                                   |
| Young Sciencephiles    | *             | *                  | 0.35                            | *                                | *                                 |
| <b>SciInfoSeek</b>     |               |                    |                                 |                                  |                                   |
| Free-Timers            | *             |                    |                                 |                                  |                                   |
| Senior Sciencephiles   | *             | *                  |                                 |                                  |                                   |
| Intrigued Adolescents  | *             | 1.00               | *                               |                                  |                                   |
| Fully Employed Parents | *             | 1.00               | *                               | 1.00                             |                                   |
| Young Sciencephiles    | *             | *                  | 1.00                            | *                                | *                                 |

Comparison 3: Topical Interests.

| <b>Medicine</b>                 | <i>Non-CS</i> | <i>Free-Timers</i> | <i>Senior<br/>Sciencephiles</i> | <i>Intrigued<br/>Adolescents</i> | <i>Fully Employed<br/>Parents</i> |
|---------------------------------|---------------|--------------------|---------------------------------|----------------------------------|-----------------------------------|
| Free-Timers                     | *             |                    |                                 |                                  |                                   |
| Senior Sciencephiles            | 1.00          | *                  |                                 |                                  |                                   |
| Intrigued Adolescents           | *             | *                  | *                               |                                  |                                   |
| Fully Employed Parents          | 0.13          | *                  | 0.14                            | 1.00                             |                                   |
| Young Sciencephiles             | 1.00          | *                  | 1.00                            | 0.46                             | 1.00                              |
| <b>Environment &amp; Energy</b> |               |                    |                                 |                                  |                                   |
| Free-Timers                     | *             |                    |                                 |                                  |                                   |
| Senior Sciencephiles            | *             | 0.28               |                                 |                                  |                                   |
| Intrigued Adolescents           | 1.00          | 1.00               | *                               |                                  |                                   |
| Fully Employed Parents          | 0.35          | 1.00               | 0.56                            | 1.00                             |                                   |
| Young Sciencephiles             | *             | 1.00               | 1.00                            | 0.26                             | 1.00                              |
| <b>Biology</b>                  |               |                    |                                 |                                  |                                   |
| Free-Timers                     | *             |                    |                                 |                                  |                                   |
| Senior Sciencephiles            | *             | 1.00               |                                 |                                  |                                   |
| Intrigued Adolescents           | 0.07          | 0.92               | 0.90                            |                                  |                                   |
| Fully Employed Parents          | 1.00          | *                  | *                               | 0.92                             |                                   |
| Young Sciencephiles             | *             | 1.00               | 1.00                            | 0.40                             | *                                 |
| <b>Space Exploration</b>        |               |                    |                                 |                                  |                                   |
| Free-Timers                     | *             |                    |                                 |                                  |                                   |
| Senior Sciencephiles            | *             | *                  |                                 |                                  |                                   |
| Intrigued Adolescents           | *             | 0.57               | 1.00                            |                                  |                                   |
| Fully Employed Parents          | *             | 1.00               | 0.57                            | 1.00                             |                                   |
| Young Sciencephiles             | *             | 1.00               | 0.58                            | 1.00                             | 1.00                              |
| <b>Political Science</b>        |               |                    |                                 |                                  |                                   |
| Free-Timers                     | 1.00          |                    |                                 |                                  |                                   |
| Senior Sciencephiles            | 0.47          | 0.74               |                                 |                                  |                                   |
| Intrigued Adolescents           | 1.00          | 1.00               | 0.48                            |                                  |                                   |
| Fully Employed Parents          | 1.00          | 1.00               | 0.16                            | 1.00                             |                                   |
| Young Sciencephiles             | 0.53          | 0.74               | 1.00                            | 0.48                             | 0.18                              |
| <b>Psychology</b>               |               |                    |                                 |                                  |                                   |
| Free-Timers                     | *             |                    |                                 |                                  |                                   |
| Senior Sciencephiles            | 1.00          | *                  |                                 |                                  |                                   |
| Intrigued Adolescents           | 0.32          | 0.58               | 0.17                            |                                  |                                   |
| Fully Employed Parents          | 1.00          | *                  | 1.00                            | 0.60                             |                                   |
| Young Sciencephiles             | 1.00          | 0.06               | 1.00                            | 1.00                             | 1.00                              |
| <b>History</b>                  |               |                    |                                 |                                  |                                   |
| Free-Timers                     | *             |                    |                                 |                                  |                                   |
| Senior Sciencephiles            | 0.78          | 1.00               |                                 |                                  |                                   |
| Intrigued Adolescents           | 0.61          | 1.00               | 1.00                            |                                  |                                   |
| Fully Employed Parents          | 0.78          | 1.00               | 1.00                            | 1.00                             |                                   |
| Young Sciencephiles             | 1.00          | 1.00               | 1.00                            | 1.00                             | 1.00                              |

Comparison 4: Legacy Media Sources.

| <b>Swiss Public TV</b>            | <i>Non-CS</i> | <i>Free-Timers</i> | <i>Senior Sciencephiles</i> | <i>Intrigued Adolescents</i> | <i>Fully Employed Parents</i> |
|-----------------------------------|---------------|--------------------|-----------------------------|------------------------------|-------------------------------|
| Free-Timers                       | 0.49          |                    |                             |                              |                               |
| Senior Sciencephiles              | 0.36          | *                  |                             |                              |                               |
| Intrigued Adolescents             | *             | *                  | 0.49                        |                              |                               |
| Fully Employed Parents            | 1.00          | 1.00               | 1.00                        | *                            |                               |
| Young Sciencephiles               | 1.00          | 1.00               | 1.00                        | *                            | 1.00                          |
| <b>Other TV</b>                   |               |                    |                             |                              |                               |
| Free-Timers                       | *             |                    |                             |                              |                               |
| Senior Sciencephiles              | 0.68          | 0.34               |                             |                              |                               |
| Intrigued Adolescents             | 0.11          | *                  | *                           |                              |                               |
| Fully Employed Parents            | 1.00          | 0.45               | 1.00                        | 0.11                         |                               |
| Young Sciencephiles               | 0.05          | 1.00               | 0.68                        | *                            | 0.68                          |
| <b>Swiss Public Radio</b>         |               |                    |                             |                              |                               |
| Free-Timers                       | 1.00          |                    |                             |                              |                               |
| Senior Sciencephiles              | 1.00          | 1.00               |                             |                              |                               |
| Intrigued Adolescents             | 0.07          | *                  | 0.39                        |                              |                               |
| Fully Employed Parents            | 1.00          | 1.00               | 1.00                        | 1.00                         |                               |
| Young Sciencephiles               | 1.00          | 0.69               | 1.00                        | 1.00                         | 1.00                          |
| <b>Other Radio</b>                |               |                    |                             |                              |                               |
| Free-Timers                       | 0.76          |                    |                             |                              |                               |
| Senior Sciencephiles              | 1.00          | 1.00               |                             |                              |                               |
| Intrigued Adolescents             | 1.00          | 0.18               | 1.00                        |                              |                               |
| Fully Employed Parents            | 1.00          | 1.00               | 1.00                        | 1.00                         |                               |
| Young Sciencephiles               | 1.00          | 1.00               | 1.00                        | 1.00                         | 1.00                          |
| <b>Newspapers &amp; Magazines</b> |               |                    |                             |                              |                               |
| Free-Timers                       | 0.08          |                    |                             |                              |                               |
| Senior Sciencephiles              | *             | 1.00               |                             |                              |                               |
| Intrigued Adolescents             | 0.18          | *                  | *                           |                              |                               |
| Fully Employed Parents            | *             | *                  | *                           | 1.00                         |                               |
| Young Sciencephiles               | 0.08          | 1.00               | 1.00                        | *                            | *                             |
| <b>Science Magazines</b>          |               |                    |                             |                              |                               |
| Free-Timers                       | *             |                    |                             |                              |                               |
| Senior Sciencephiles              | *             | 0.22               |                             |                              |                               |
| Intrigued Adolescents             | 0.19          | 0.55               | *                           |                              |                               |
| Fully Employed Parents            | 0.14          | 0.69               | 0.11                        | 0.79                         |                               |
| Young Sciencephiles               | *             | *                  | *                           | *                            | *                             |
| <b>Internet</b>                   |               |                    |                             |                              |                               |
| Free-Timers                       | *             |                    |                             |                              |                               |
| Senior Sciencephiles              | *             | *                  |                             |                              |                               |
| Intrigued Adolescents             | *             | *                  | 0.41                        |                              |                               |
| Fully Employed Parents            | *             | 0.42               | *                           | 0.23                         |                               |
| Young Sciencephiles               | *             | *                  | 0.23                        | *                            | *                             |

Comparison 5: Online Sources.

| Online News                   | Non-CS | Free-Timers | Senior Sciencephiles | Intrigued Adolescents | Fully Employed Parents |
|-------------------------------|--------|-------------|----------------------|-----------------------|------------------------|
| Free-Timers                   | 0.78   |             |                      |                       |                        |
| Senior Sciencephiles          | *      | *           |                      |                       |                        |
| Intrigued Adolescents         | *      | 0.44        | 0.66                 |                       |                        |
| Fully Employed Parents        | 1.00   | 1.00        | *                    | 0.44                  |                        |
| Young Sciencephiles           | *      | *           | 1.00                 | 0.28                  | *                      |
| <b>Media Libraries</b>        |        |             |                      |                       |                        |
| Free-Timers                   | 0.06   |             |                      |                       |                        |
| Senior Sciencephiles          | *      | 1.00        |                      |                       |                        |
| Intrigued Adolescents         | 1.00   | 1.00        | 1.00                 |                       |                        |
| Fully Employed Parents        | 1.00   | 1.00        | 1.00                 | 1.00                  |                        |
| Young Sciencephiles           | *      | *           | *                    | *                     | *                      |
| <b>Institutional Websites</b> |        |             |                      |                       |                        |
| Free-Timers                   | *      |             |                      |                       |                        |
| Senior Sciencephiles          | *      | *           |                      |                       |                        |
| Intrigued Adolescents         | *      | 1.00        | *                    |                       |                        |
| Fully Employed Parents        | *      | 1.00        | *                    | 1.00                  |                        |
| Young Sciencephiles           | *      | *           | 0.10                 | *                     | *                      |
| <b>Facebook</b>               |        |             |                      |                       |                        |
| Free-Timers                   | 1.00   |             |                      |                       |                        |
| Senior Sciencephiles          | 0.24   | 0.24        |                      |                       |                        |
| Intrigued Adolescents         | *      | *           | *                    |                       |                        |
| Fully Employed Parents        | 1.00   | 1.00        | 1.00                 | *                     |                        |
| Young Sciencephiles           | *      | *           | *                    | 0.39                  | *                      |
| <b>Blogs</b>                  |        |             |                      |                       |                        |
| Free-Timers                   | 1.00   |             |                      |                       |                        |
| Senior Sciencephiles          | *      | 0.05        |                      |                       |                        |
| Intrigued Adolescents         | *      | *           | 0.65                 |                       |                        |
| Fully Employed Parents        | 1.00   | 1.00        | 0.33                 | *                     |                        |
| Young Sciencephiles           | *      | *           | *                    | 0.65                  | *                      |
| <b>Wikipedia</b>              |        |             |                      |                       |                        |
| Free-Timers                   | 0.33   |             |                      |                       |                        |
| Senior Sciencephiles          | *      | *           |                      |                       |                        |
| Intrigued Adolescents         | *      | *           | 1.00                 |                       |                        |
| Fully Employed Parents        | 1.00   | 1.00        | *                    | *                     |                        |
| Young Sciencephiles           | *      | *           | 0.33                 | 0.11                  | *                      |
| <b>YouTube</b>                |        |             |                      |                       |                        |
| Free-Timers                   | 0.15   |             |                      |                       |                        |
| Senior Sciencephiles          | *      | 0.81        |                      |                       |                        |
| Intrigued Adolescents         | *      | *           | *                    |                       |                        |
| Fully Employed Parents        | 0.27   | 1.00        | 1.00                 | *                     |                        |
| Young Sciencephiles           | *      | *           | *                    | 1.00                  | *                      |

Comparison 6: Other Contact

| <b>Museums</b>         | <i>Non-CS</i> | <i>Free-Timers</i> | <i>Senior<br/>Sciencephiles</i> | <i>Intrigued<br/>Adolescents</i> | <i>Fully Employed<br/>Parents</i> |
|------------------------|---------------|--------------------|---------------------------------|----------------------------------|-----------------------------------|
| Free-Timers            | *             |                    |                                 |                                  |                                   |
| Senior Sciencephiles   | *             | 1.00               |                                 |                                  |                                   |
| Intrigued Adolescents  | 0.71          | 1.00               | 0.68                            |                                  |                                   |
| Fully Employed Parents | 0.39          | 1.00               | 1.00                            | 1.00                             |                                   |
| Young Sciencephiles    | 0.32          | 1.00               | 1.00                            | 1.00                             | 1.00                              |
| <b>Zoos</b>            |               |                    |                                 |                                  |                                   |
| Free-Timers            | *             |                    |                                 |                                  |                                   |
| Senior Sciencephiles   | 1.00          | 0.09               |                                 |                                  |                                   |
| Intrigued Adolescents  | *             | *                  | 0.19                            |                                  |                                   |
| Fully Employed Parents | 1.00          | 1.00               | 1.00                            | *                                |                                   |
| Young Sciencephiles    | 1.00          | 0.38               | 1.00                            | 0.44                             | 1.00                              |
| <b>Events</b>          |               |                    |                                 |                                  |                                   |
| Free-Timers            | *             |                    |                                 |                                  |                                   |
| Senior Sciencephiles   | *             | *                  |                                 |                                  |                                   |
| Intrigued Adolescents  | 0.97          | 0.22               | *                               |                                  |                                   |
| Fully Employed Parents | 0.66          | 0.70               | *                               | 0.97                             |                                   |
| Young Sciencephiles    | *             | *                  | 0.66                            | *                                | *                                 |
| <b>Books</b>           |               |                    |                                 |                                  |                                   |
| Free-Timers            | *             |                    |                                 |                                  |                                   |
| Senior Sciencephiles   | *             | *                  |                                 |                                  |                                   |
| Intrigued Adolescents  | *             | 0.40               | *                               |                                  |                                   |
| Fully Employed Parents | *             | 0.83               | *                               | 0.83                             |                                   |
| Young Sciencephiles    | *             | *                  | 0.83                            | *                                | *                                 |
| <b>Movies</b>          |               |                    |                                 |                                  |                                   |
| Free-Timers            | *             |                    |                                 |                                  |                                   |
| Senior Sciencephiles   | 1.00          | 0.08               |                                 |                                  |                                   |
| Intrigued Adolescents  | 0.12          | 1.00               | 1.00                            |                                  |                                   |
| Fully Employed Parents | 1.00          | 0.30               | 1.00                            | 1.00                             |                                   |
| Young Sciencephiles    | *             | 1.00               | 0.10                            | 1.00                             | 0.25                              |
| <b>Conversations</b>   |               |                    |                                 |                                  |                                   |
| Free-Timers            | *             |                    |                                 |                                  |                                   |
| Senior Sciencephiles   | *             | *                  |                                 |                                  |                                   |
| Intrigued Adolescents  | *             | 0.93               | 0.34                            |                                  |                                   |
| Fully Employed Parents | *             | 0.93               | *                               | 0.81                             |                                   |
| Young Sciencephiles    | *             | *                  | 0.34                            | *                                | *                                 |
